# Supplementary material
Source: PubMed Central journal article supplement (PMC3187067)
Supplement: supp_10_10_1348__1.pdf [file supp_10_10_1348__1.pdf]

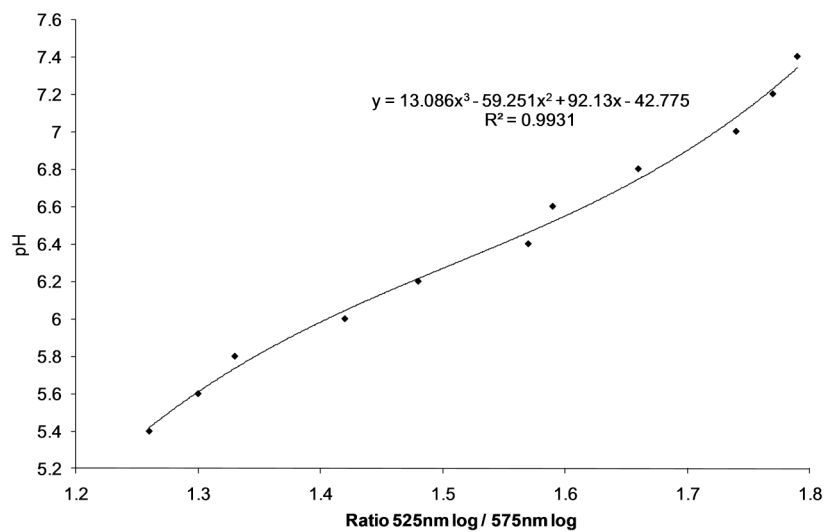

**Figure S1. Sample calibration curve used to estimate absolute values of intracellular pH in yeast populations.** Yeast cells were stained with CF-DA and incubated with amphotericin B in various buffers encompassing a range of pHs. Fluorescence emissions were measured with a flow cytometer.

**Table S1: Functional characterizations of differentially expressed genes in strains carrying evolved alleles as compared to the progenitor strain.** Analyses were performed using DAVID (13). Results with a false discovery rate (FDR) of less than 10% are presented.

| <b>MDS3e: Down-Regulated (91 genes)</b> |              |          |               |                                                                                                                                                                                                                                                                                       |                   |                 |                  |                     |            |
|-----------------------------------------|--------------|----------|---------------|---------------------------------------------------------------------------------------------------------------------------------------------------------------------------------------------------------------------------------------------------------------------------------------|-------------------|-----------------|------------------|---------------------|------------|
| <b>Gene Ontology Term</b>               | <b>Count</b> | <b>%</b> | <b>PValue</b> | <b>Genes</b>                                                                                                                                                                                                                                                                          | <b>List Total</b> | <b>Pop Hits</b> | <b>Pop Total</b> | <b>Fold Enrich.</b> | <b>FDR</b> |
| Response to temperature stimulus        | 31           | 33.7     | 1.86E-22      | YOR178C, YBR054W, YGR248W, YDR074W, YKL163W, YNL160W, YMR090W, YPR160W, YML100W, YBR117C, YLL039C, YMR250W, YMR105C, YJR096W, YMR169C, YFL030W, YAL061W, YDR406W, YIL066C, YBR072W, YBR169C, YLR258W, YLR178C, YBR214W, YGR088W, YML128C, YFL014W, YNL237W, YDR453C, YER150W, YHR087W | 74                | 217             | 4882             | 9.42471             | 2.20E-19   |
| Response to heat                        | 24           | 26.1     | 4.56E-15      | YOR178C, YDR406W, YBR054W, YKL163W, YNL160W, YIL066C, YBR169C, YLR258W, YMR090W, YPR160W, YML100W, YBR214W, YBR117C, YGR088W, YML128C, YFL014W, YNL237W, YLL039C, YMR250W, YDR453C, YER150W, YJR096W, YHR087W, YFL030W                                                                | 74                | 203             | 4882             | 7.79976             | 5.37E-12   |
| Monosaccharide metabolic process        | 18           | 19.6     | 6.31E-12      | YOR178C, YPR184W, YMR323W, YGR043C, YGR248W, YGR256W, YGL156W, YLR258W, YPR160W, YBR117C, YER054C, YOR393W, YDL085W, YMR105C, YJR096W, YOR120W, YIL099W, YDL021W                                                                                                                      | 74                | 136             | 4882             | 8.731717            | 7.45E-09   |
| Carbohydrate catabolic process          | 15           | 16.3     | 1.07E-11      | YPR184W, YMR323W, YGR248W, YGR043C, YGR256W, YGL156W, YPR160W, YBR117C,                                                                                                                                                                                                               | 74                | 84              | 4882             | 11.78089            | 1.26E-08   |

|                                         |    |      |          |                                                                                                                                                                                                                                                         |    |     |      |          |          |
|-----------------------------------------|----|------|----------|---------------------------------------------------------------------------------------------------------------------------------------------------------------------------------------------------------------------------------------------------------|----|-----|------|----------|----------|
|                                         |    |      |          | YOR393W, YDL085W,<br>YMR105C, YJR096W,<br>YDL021W, YIL099W,<br>YOR120W                                                                                                                                                                                  |    |     |      |          |          |
| Alcohol catabolic process               | 11 | 11.9 | 2.76E-08 | YBR117C, YMR323W,<br>YOR393W, YGR043C,<br>YGR248W, YDL085W,<br>YGR256W, YMR105C,<br>YJR096W, YOR120W,<br>YDL021W                                                                                                                                        | 74 | 65  | 4882 | 11.16466 | 3.26E-05 |
| Carbohydrate metabolic process          | 21 | 22.8 | 4.58E-08 | YOR178C, YPR184W,<br>YMR323W, YGR043C,<br>YGR248W, YDR074W,<br>YGR256W, YER096W,<br>YGL156W, YLR258W,<br>YML100W, YPR160W,<br>YBR117C, YER054C,<br>YOR393W, YDL085W,<br>YMR105C, YJR096W,<br>YOR120W, YIL099W,<br>YDL021W                               | 74 | 335 | 4882 | 4.135619 | 5.40E-05 |
| Cellular carbohydrate metabolic process | 20 | 21.7 | 1.67E-07 | YOR178C, YPR184W,<br>YMR323W, YGR043C,<br>YGR248W, YDR074W,<br>YGR256W, YGL156W,<br>YLR258W, YML100W,<br>YPR160W, YBR117C,<br>YER054C, YOR393W,<br>YDL085W, YMR105C,<br>YJR096W, YOR120W,<br>YIL099W, YDL021W                                           | 74 | 327 | 4882 | 4.035044 | 1.97E-04 |
| Macromolecule catabolic process         | 23 | 25   | 1.62E-06 | YOR173W, YPR184W,<br>YGR248W, YDR074W,<br>YGL156W, YLR258W,<br>YER053C, YLR178C,<br>YML100W, YPR160W,<br>YBR214W, YER054C,<br>YGR088W, YFL014W,<br>YMR174C, YMR250W,<br>YDR453C, YMR105C,<br>YER150W, YMR169C,<br>YER035W, YAL061W,<br>YIL099W          | 74 | 496 | 4882 | 3.059231 | 0.001906 |
| Cellular response to stress             | 24 | 26.1 | 3.53E-06 | YDR406W, YBR054W,<br>YKL163W, YNL160W,<br>YIL066C, YBR169C,<br>YLR258W, YMR090W,<br>YML100W, YPR160W,<br>YBR214W, YBR117C,<br>YGR088W, YML128C,<br>YFL014W, YNL237W,<br>YLL039C, YMR250W,<br>YDR453C, YER150W,<br>YJR096W, YER035W,<br>YHR087W, YFL030W | 74 | 562 | 4882 | 2.817351 | 0.004165 |
| Cellular catabolic process              | 25 | 27.2 | 3.95E-05 | YOR173W, YGR248W,<br>YGR043C, YDR074W,<br>YGL156W, YML100W,                                                                                                                                                                                             | 74 | 696 | 4882 | 2.369719 | 0.046559 |

|                                                        |       |      |          | YPR160W, YER054C, YMR174C, YMR250W, YMR105C, YMR169C, YAL061W, YPR184W, YOR348C, YLR258W, YLR178C, YER053C, YBR214W, YLR438W, YGR088W, YFL014W, YDR453C, YER150W, YER035W |            |          |           |              |          |
|--------------------------------------------------------|-------|------|----------|---------------------------------------------------------------------------------------------------------------------------------------------------------------------------|------------|----------|-----------|--------------|----------|
| Response to oxidative stress                           | 7     | 7.6  | 0.001296 | YKL026C, YGR088W, YFL014W, YDR453C, YMR250W, YJR096W, YOR120W                                                                                                             | 74         | 82       | 4882      | 5.631839     | 1.5186   |
| Generation of precursor metabolites and energy         | 12    | 13   | 0.001671 | YPR160W, YOR178C, YKL093W, YPR184W, YER054C, YMR323W, YOR393W, YDL085W, YMR105C, YLR258W, YDL021W, YIL099W                                                                | 74         | 264      | 4882      | 2.998771     | 1.954101 |
| Carbohydrate biosynthetic process                      | 7     | 7.6  | 0.002617 | YML100W, YOR178C, YPR184W, YDR074W, YMR105C, YER096W, YLR258W                                                                                                             | 74         | 94       | 4882      | 4.912881     | 3.045008 |
| Sporulation resulting in formation of a cellular spore | 10    | 10.9 | 0.005108 | YOR178C, YER054C, YML128C, YDL222C, YLL039C, YNL194C, YER096W, YLR258W, YPR192W, YIL099W                                                                                  | 74         | 220      | 4882      | 2.998771     | 5.862913 |
| Alkaloid metabolic process                             | 5     | 5.4  | 0.006306 | YBR117C, YGR043C, YGR248W, YDL085W, YGR256W                                                                                                                               | 74         | 50       | 4882      | 6.597297     | 7.192779 |
| <b>MDS3e: Up-regulated (47 genes)</b>                  |       |      |          |                                                                                                                                                                           |            |          |           |              |          |
| Gene Ontology Term                                     | Count | %    | PValue   | Genes                                                                                                                                                                     | List Total | Pop Hits | Pop Total | Fold Enrich. | FDR      |
| Carbohydrate transport                                 | 4     | 8.7  | 0.002469 | YDR345C, YMR011W, YHR092C, YHR094C                                                                                                                                        | 33         | 42       | 4882      | 14.08947     | 2.701808 |
| Transmembrane transport                                | 7     | 15.2 | 0.005094 | YML123C, YDR345C, YMR011W, YHR092C, YHR094C, YBR296C, YMR319C                                                                                                             | 33         | 251      | 4882      | 4.1258       | 5.500594 |
| Transport                                              | 16    | 34.8 | 0.006281 | YNL095C, YDR345C, YOR049C, YJL012C, YBR296C, YMR319C, YPL019C, YPR194C, YAL067C, YML123C, YJR048W, YLL038C, YGR234W, YMR011W, YHR092C, YHR094C                            | 33         | 1230     | 4882      | 1.924415     | 6.742447 |

| <b>MKT1e: Down-regulated (41 genes)</b> |              |          |               |                                                                                                                                                                                                                                                               |                   |                 |                  |                     |            |
|-----------------------------------------|--------------|----------|---------------|---------------------------------------------------------------------------------------------------------------------------------------------------------------------------------------------------------------------------------------------------------------|-------------------|-----------------|------------------|---------------------|------------|
| <b>Gene Ontology Term</b>               | <b>Count</b> | <b>%</b> | <b>PValue</b> | <b>Genes</b>                                                                                                                                                                                                                                                  | <b>List Total</b> | <b>Pop Hits</b> | <b>Pop Total</b> | <b>Fold Enrich.</b> | <b>FDR</b> |
| Peptide transport                       | 4            | 10       | 1.54E-05      | YPR194C, YKR093W, YJR152W, YJL212C                                                                                                                                                                                                                            | 34                | 8               | 4882             | 71.79412            | 0.017518   |
| Amine metabolic process                 | 10           | 25       | 1.18E-04      | YAL062W, YIR027C, YMR303C, YIR028W, YIR029W, YIR031C, YMR170C, YBR208C, YLR155C, YJR103W                                                                                                                                                                      | 34                | 301             | 4882             | 4.770373            | 0.134094   |
| Heterocycle metabolic process           | 9            | 22.5     | 1.32E-04      | YHR216W, YBR085W, YIR027C, YAR073W, YIR028W, YIR029W, YIR031C, YBR208C, YJR103W                                                                                                                                                                               | 34                | 237             | 4882             | 5.452718            | 0.150308   |
| Amide transport                         | 3            | 7.5      | 4.38E-04      | YIR028W, YJR152W, YHL016C                                                                                                                                                                                                                                     | 34                | 5               | 4882             | 86.15294            | 0.496485   |
| Cellular catabolic process              | 13           | 32.5     | 0.00128       | YMR303C, YIR028W, YIR031C, YHL016C, YDL160C, YIR027C, YIR029W, YMR170C, YPR002W, YBR208C, YLR155C, YMR006C, YGL205W                                                                                                                                           | 34                | 696             | 4882             | 2.681964            | 1.446347   |
| Cellular ketone metabolic process       | 9            | 22.5     | 0.003387      | YAL062W, YMR303C, YIR031C, YMR170C, YBR208C, YPR002W, YLR155C, YGL205W, YJR103W                                                                                                                                                                               | 34                | 386             | 4882             | 3.347912            | 3.784685   |
| Organic acid metabolic process          | 9            | 22.5     | 0.003728      | YAL062W, YMR303C, YIR031C, YMR170C, YBR208C, YPR002W, YLR155C, YGL205W, YJR103W                                                                                                                                                                               | 34                | 392             | 4882             | 3.296669            | 4.158163   |
| <b>MKT1e: Up-regulated (182 genes)</b>  |              |          |               |                                                                                                                                                                                                                                                               |                   |                 |                  |                     |            |
| <b>Term</b>                             | <b>Count</b> | <b>%</b> | <b>PValue</b> | <b>Genes</b>                                                                                                                                                                                                                                                  | <b>List Total</b> | <b>Pop Hits</b> | <b>Pop Total</b> | <b>Fold Enrich.</b> | <b>FDR</b> |
| Mitochondrion organization              | 72           | 39.6     | 4.00E-50      | YNL252C, YHR147C, YDR337W, YGR084C, YHR038W, YKR006C, YDR347W, YLR168C, YKL138C, YJL063C, YMR193W, YJR101W, YOR266W, YKL053C-A, YPL104W, YPL173W, YCR003W, YDR322W, YOR158W, YGR112W, YNL073W, YNL315C, YDR116C, YBR185C, YDL202W, YKL170W, YMR024W, YLL009C, | 155               | 275             | 4882             | 8.246428            | 4.93E-47   |

|                           |    |    |          |                                                                                                                                                                                                                                                                                                                                                                                                                                                                                                                                                                                                                                                                                                                                   |     |      |      |          |          |
|---------------------------|----|----|----------|-----------------------------------------------------------------------------------------------------------------------------------------------------------------------------------------------------------------------------------------------------------------------------------------------------------------------------------------------------------------------------------------------------------------------------------------------------------------------------------------------------------------------------------------------------------------------------------------------------------------------------------------------------------------------------------------------------------------------------------|-----|------|------|----------|----------|
|                           |    |    |          | YGR076C, YGR165W, YBL038W, YCR071C, YHR116W, YHR024C, YLR069C, YDR175C, YNL284C, YDR405W, YGL129C, YGR062C, YJL180C, YML025C, YOR150W, YEL030W, YDR375C, YHL004W, YPR047W, YKR085C, YJR113C, YDR296W, YNL137C, YDR462W, YBR192W, YCR024C, YHR011W, YIL093C, YBL090W, YIL098C, YER058W, YJL116C, YBR146W, YPL040C, YMR158W, YJL096W, YGL143C, YNL185C, YDR237W, YPL189C-A, YLR312W-A, YHR091C, YOL023W, YMR188C                                                                                                                                                                                                                                                                                                                    |     |      |      |          |          |
| Protein metabolic process | 91 | 50 | 1.00E-09 | YNL252C, YHR147C, YDR337W, YGR084C, YHR038W, YKR006C, YDR347W, YKL138C, YJL063C, YOL071W, YJL048C, YMR193W, YJR101W, YPL104W, YPR151C, YNL052W, YPL173W, YCR003W, YDR322W, YOR158W, YNL073W, YDR116C, YBR120C, YGL032C, YLR439W, YDL202W, YBR072W, YLR239C, YKL170W, YNL122C, YMR024W, YGR088W, YMR069W, YGR109W-B, YLL009C, YGL068W, YGL107C, YGR076C, YGR165W, YBL038W, YCR071C, YHR109W, YHR116W, YGL236C, YHR024C, YDR494W, YCL027W, YLR069C, YDR175C, YNL284C, YDR405W, YGL129C, YGR062C, YGL258W-A, YML025C, YOR150W, YEL030W, YHR015W, YKL087C, YLR121C, YHL004W, YPR047W, YKR085C, YJR113C, YNL137C, YDR462W, YCR024C, YHR011W, YIL093C, YIR039C, YPL097W, YNR044W, YBL090W, YER058W, YEL050C, YIL098C, YGR220C, YBR146W, | 155 | 1699 | 4882 | 1.686996 | 1.24E-06 |

|                                                |    |      |          |                                                                                                                                                                                                                                                                                                                                                                                                                                                                                                                                                                                                                                                                                                                                                                                                                                                    |     |      |      |          |          |
|------------------------------------------------|----|------|----------|----------------------------------------------------------------------------------------------------------------------------------------------------------------------------------------------------------------------------------------------------------------------------------------------------------------------------------------------------------------------------------------------------------------------------------------------------------------------------------------------------------------------------------------------------------------------------------------------------------------------------------------------------------------------------------------------------------------------------------------------------------------------------------------------------------------------------------------------------|-----|------|------|----------|----------|
|                                                |    |      |          | YAL039C, YPL040C,<br>YMR158W, YJL096W,<br>YGL143C, YNL185C,<br>YDR237W, YLR312W-A,<br>YGL259W, YER150W,<br>YHR091C, YOL023W,<br>YMR188C                                                                                                                                                                                                                                                                                                                                                                                                                                                                                                                                                                                                                                                                                                            |     |      |      |          |          |
| Generation of precursor metabolites and energy | 28 | 15.4 | 3.29E-08 | YML120C, YIL070C,<br>YPL252C, YLL041C,<br>YDR175C, YKR046C,<br>YOR065W, YPL132W,<br>YOL071W, YJR048W,<br>YDR375C, YNL111C,<br>YEL024W, YNL052W,<br>YHR011W, YGR112W,<br>YDR116C, YBR185C,<br>YMR145C, YMR267W,<br>YMR118C, YJL089W,<br>YGL068W, YGL107C,<br>YGR165W, YOL152W,<br>YMR188C, YHR116W                                                                                                                                                                                                                                                                                                                                                                                                                                                                                                                                                  | 155 | 264  | 4882 | 3.340567 | 4.06E-05 |
| Macromolecule biosynthetic process             | 78 | 42.9 | 1.31E-07 | YNL252C, YHR147C,<br>YDR337W, YGR084C,<br>YHR038W, YKR006C,<br>YDR347W, YKL138C,<br>YJL063C, YMR193W,<br>YJR101W, YPL104W,<br>YNL052W, YPL173W,<br>YCR003W, YDR322W,<br>YOR158W, YNL073W,<br>YDR116C, YBR120C,<br>YGL032C, YLR439W,<br>YDL202W, YKL170W,<br>YMR024W, YNL122C,<br>YGR109W-B, YGL068W,<br>YLL009C, YGR076C,<br>YGL107C, YGR165W,<br>YBL038W, YCR071C,<br>YHR116W, YGL236C,<br>YDR494W, YCL027W,<br>YLR069C, YDR175C,<br>YNL284C, YDR405W,<br>YGL129C, YGR062C,<br>YML025C, YOR150W,<br>YHR015W, YLR121C,<br>YHL004W, YPR047W,<br>YKR085C, YJR113C,<br>YDR296W, YNL137C,<br>YDR462W, YCR024C,<br>YHR011W, YIL093C,<br>YPL097W, YNR044W,<br>YBL090W, YEL050C,<br>YER058W, YGR220C,<br>YBR146W, YAL039C,<br>YHL024W, YPL040C,<br>YJL089W, YMR158W,<br>YJL096W, YGL143C,<br>YNL185C, YDR237W,<br>YLR312W-A, YHR091C,<br>YOL023W, YMR188C | 155 | 1473 | 4882 | 1.667854 | 1.62E-04 |

|                               |    |      |          |                                                                                                                                                                                                                                                                                                                                                                                                                                                                                                                                                                                                                                                                                                                                |     |      |      |          |          |
|-------------------------------|----|------|----------|--------------------------------------------------------------------------------------------------------------------------------------------------------------------------------------------------------------------------------------------------------------------------------------------------------------------------------------------------------------------------------------------------------------------------------------------------------------------------------------------------------------------------------------------------------------------------------------------------------------------------------------------------------------------------------------------------------------------------------|-----|------|------|----------|----------|
| Gene expression               | 78 | 42.9 | 8.63E-06 | YNL252C, YHR147C, YDR337W, YGR084C, YHR038W, YKR006C, YDR347W, YKL138C, YJL063C, YMR193W, YJR101W, YPL104W, YNL052W, YPL173W, YCR003W, YDR322W, YOR158W, YNL073W, YDR116C, YBR120C, YGL032C, YLR439W, YDL202W, YKL170W, YMR024W, YNL122C, YGL068W, YGR076C, YGL107C, YGR165W, YBL038W, YCR071C, YHR116W, YGL236C, YHR024C, YDR494W, YDR194C, YCL027W, YLR069C, YDR175C, YNL284C, YDR405W, YGL129C, YGR062C, YML025C, YOR150W, YHR015W, YLR121C, YHL004W, YPR047W, YKR085C, YJR113C, YDR296W, YNL137C, YDR462W, YCR024C, YHR011W, YIL093C, YPL097W, YNR044W, YBL090W, YGR150C, YEL050C, YER058W, YGR220C, YBR146W, YAL039C, YPL040C, YJL089W, YMR158W, YJL096W, YGL143C, YNL185C, YDR237W, YLR312W-A, YHR091C, YOLO23W, YMR188C | 155 | 1620 | 4882 | 1.516511 | 0.010635 |
| Cellular biosynthetic process | 87 | 47.8 | 1.61E-05 | YNL252C, YHR147C, YDR337W, YGR084C, YHR038W, YKR006C, YDR347W, YKL138C, YMR095C, YJL063C, YDL244W, YMR193W, YJR101W, YPL104W, YNL052W, YPL173W, YCR003W, YDR322W, YOR158W, YNL073W, YDR116C, YBR120C, YGL032C, YLR439W, YDL202W, YPL172C, YLR239C, YKL170W, YMR024W, YNL122C, YGR109W-B, YLL009C, YGL068W, YGR076C, YGL107C, YDR511W, YGR165W, YBL038W, YCR071C, YHR116W, YGL236C, YDR494W, YPL252C, YJR122W,                                                                                                                                                                                                                                                                                                                  | 155 | 1914 | 4882 | 1.431672 | 0.019875 |



|                                                |       |      |          | YCL027W, YLR069C, YDR175C, YNL284C, YDR405W, YGL129C, YGR062C, YML025C, YOR150W, YHR015W, YNL111C, YLR121C, YHL004W, YPR047W, YFL030W, YKR085C, YJR113C, YDR296W, YNL137C, YDR462W, YCR024C, YHR011W, YIL093C, YPL097W, YNR044W, YBL090W, YEL050C, YER058W, YGR220C, YBR146W, YAL039C, YHL024W, YPL040C, YJL089W, YMR158W, YJL096W, YGL143C, YNL185C, YDR237W, YLR312W-A, YHR091C, YOL023W, YMR188C |            |          |           |              |          |  |
|------------------------------------------------|-------|------|----------|-----------------------------------------------------------------------------------------------------------------------------------------------------------------------------------------------------------------------------------------------------------------------------------------------------------------------------------------------------------------------------------------------------|------------|----------|-----------|--------------|----------|--|
| Electron transport chain                       | 11    | 6    | 4.39E-05 | YOL071W, YMR118C, YML120C, YPL252C, YJR048W, YLL041C, YNL111C, YOR065W, YNL052W, YEL024W, YOL152W                                                                                                                                                                                                                                                                                                   | 155        | 68       | 4882      | 5.095066     | 0.054045 |  |
| <b>MDS3e_MKT1e: Down-regulated (128 genes)</b> |       |      |          |                                                                                                                                                                                                                                                                                                                                                                                                     |            |          |           |              |          |  |
| Gene Ontology Term                             | Count | %    | PValue   | Genes                                                                                                                                                                                                                                                                                                                                                                                               | List Total | Pop Hits | Pop Total | Fold Enrich. | FDR      |  |
| Response to temperature stimulus               | 35    | 27.3 | 1.51E-21 | YOR178C, YKL151C, YGR248W, YKL051W, YKL163W, YNL160W, YKL096W, YMR090W, YPR160W, YML100W, YBR117C, YKR091W, YBR056W, YDR001C, YLL039C, YMR250W, YIR038C, YMR105C, YMR169C, YJR096W, YAL061W, YAL062W, YCR019W, YIL066C, YBR169C, YLR258W, YLR178C, YBR214W, YGR088W, YML128C, YFL014W, YDR453C, YER150W, YHR087W, YBL078C                                                                           | 105        | 217      | 4882      | 7.499232     | 1.83E-18 |  |
| Response to heat                               | 30    | 23.4 | 3.51E-17 | YOR178C, YKL151C, YKL051W, YKL163W, YNL160W, YKL096W, YMR090W, YPR160W, YML100W, YBR117C, YKR091W, YBR056W, YDR001C, YLL039C,                                                                                                                                                                                                                                                                       | 105        | 203      | 4882      | 6.871217     | 4.26E-14 |  |

|                                  |    |      |          |                                                                                                                                                                                                                                                                                                                                                      |     |     |      |          |          |
|----------------------------------|----|------|----------|------------------------------------------------------------------------------------------------------------------------------------------------------------------------------------------------------------------------------------------------------------------------------------------------------------------------------------------------------|-----|-----|------|----------|----------|
|                                  |    |      |          | YMR250W, YIR038C, YJR096W, YAL062W, YCR019W, YIL066C, YBR169C, YLR258W, YBR214W, YGR088W, YML128C, YFL014W, YDR453C, YER150W, YHR087W, YBL078C                                                                                                                                                                                                       |     |     |      |          |          |
| Cellular catabolic process       | 38 | 29.7 | 3.18E-08 | YOR173W, YMR303C, YGR043C, YGR248W, YLR164W, YIR031C, YHL016C, YPR160W, YML100W, YER054C, YDR001C, YMR174C, YIR029W, YMR250W, YIR038C, YMR170C, YMR105C, YMR169C, YLR155C, YAL061W, YPR184W, YEL011W, YIR028W, YOR185C, YOR348C, YLR258W, YNL202W, YLR178C, YBR214W, YLR438W, YIR027C, YGR088W, YFL014W, YDR453C, YER150W, YBR208C, YBL078C, YGL205W | 105 | 696 | 4882 | 2.538533 | 3.86E-05 |
| Cellular response to stress      | 32 | 25   | 2.86E-07 | YKL151C, YKL051W, YKL163W, YNL160W, YKL096W, YMR090W, YPR160W, YML100W, YBR117C, YKR091W, YBR056W, YDR001C, YLL039C, YMR250W, YIR038C, YJR096W, YLR155C, YAL062W, YCR019W, YCR026C, YIL066C, YBR169C, YLR258W, YML058W-A, YBR214W, YGR088W, YML128C, YFL014W, YDR453C, YER150W, YHR087W, YBL078C                                                     | 105 | 562 | 4882 | 2.647416 | 3.48E-04 |
| Monosaccharide metabolic process | 15 | 11.7 | 8.11E-07 | YOR178C, YPR184W, YEL011W, YGR043C, YGR248W, YGR256W, YLR258W, YPR160W, YBR117C, YER054C, YDL085W, YMR105C, YJR096W, YDL021W, YIL099W                                                                                                                                                                                                                | 105 | 136 | 4882 | 5.128151 | 9.85E-04 |
| Carbohydrate catabolic process   | 12 | 9.4  | 1.22E-06 | YPR160W, YBR117C, YPR184W, YGR043C, YGR248W, YDR001C, YDL085W, YGR256W, YMR105C, YJR096W, YDL021W, YIL099W                                                                                                                                                                                                                                           | 105 | 84  | 4882 | 6.642177 | 0.001488 |
| Carbohydrate metabolic           | 21 | 16.4 | 1.89E-05 | YOR178C, YPR184W, YEL011W, YGR043C,                                                                                                                                                                                                                                                                                                                  | 105 | 335 | 4882 | 2.914627 | 0.022932 |

|                                                        |    |      |          |                                                                                                                                                                                                                                                                              |     |     |      |          |          |  |
|--------------------------------------------------------|----|------|----------|------------------------------------------------------------------------------------------------------------------------------------------------------------------------------------------------------------------------------------------------------------------------------|-----|-----|------|----------|----------|--|
| process                                                |    |      |          | YGR248W, YIR031C,<br>YGR256W, YER096W,<br>YLR258W, YPR160W,<br>YML100W, YKL201C,<br>YBR117C, YER054C,<br>YDR001C, YBR056W,<br>YDL085W, YMR105C,<br>YJR096W, YIL099W,<br>YDL021W                                                                                              |     |     |      |          |          |  |
| Macromolecule catabolic process                        | 26 | 20.3 | 2.77E-05 | YOR173W, YGR248W,<br>YML100W, YPR160W,<br>YER054C, YDR001C,<br>YMR174C, YIR038C,<br>YMR250W, YMR170C,<br>YMR105C, YLR155C,<br>YMR169C, YAL061W,<br>YPR184W, YEL011W,<br>YOR185C, YLR258W,<br>YLR178C, YBR214W,<br>YGR088W, YFL014W,<br>YDR453C, YER150W,<br>YBL078C, YIL099W | 105 | 496 | 4882 | 2.43725  | 0.033694 |  |
| Cellular carbohydrate metabolic process                | 20 | 15.6 | 4.61E-05 | YOR178C, YPR184W,<br>YEL011W, YGR043C,<br>YGR248W, YIR031C,<br>YGR256W, YLR258W,<br>YPR160W, YML100W,<br>YKL201C, YBR117C,<br>YER054C, YDR001C,<br>YBR056W, YDL085W,<br>YMR105C, YJR096W,<br>YIL099W, YDL021W                                                                | 105 | 327 | 4882 | 2.843745 | 0.056008 |  |
| Alcohol catabolic process                              | 8  | 6.3  | 4.10E-04 | YBR117C, YGR043C,<br>YGR248W, YDL085W,<br>YGR256W, YMR105C,<br>YJR096W, YDL021W                                                                                                                                                                                              | 105 | 65  | 4882 | 5.722491 | 0.497505 |  |
| Amine metabolic process                                | 17 | 13.3 | 5.45E-04 | YAL062W, YMR303C,<br>YIR028W, YNL160W,<br>YIR031C, YOR348C,<br>YER096W, YMR090W,<br>YLR438W, YIR027C,<br>YIR029W, YMR250W,<br>YMR170C, YBR208C,<br>YLR155C, YMR169C,<br>YJR103W                                                                                              | 105 | 301 | 4882 | 2.625977 | 0.659894 |  |
| Generation of precursor metabolites and energy         | 15 | 11.7 | 0.001275 | YOR178C, YMR303C,<br>YPR184W, YEL011W,<br>YLR164W, YIR031C,<br>YIL111W, YLR258W,<br>YPR160W, YER054C,<br>YDR001C, YDL085W,<br>YMR105C, YDL021W,<br>YIL099W                                                                                                                   | 105 | 264 | 4882 | 2.641775 | 1.538854 |  |
| Sporulation resulting in formation of a cellular spore | 13 | 10.2 | 0.002278 | YOR178C, YER096W,<br>YKL096W, YLR258W,<br>YNL202W, YPR192W,<br>YER054C, YML128C,<br>YDL222C, YDR001C,                                                                                                                                                                        | 105 | 220 | 4882 | 2.747446 | 2.732915 |  |

|                            |    |      |          |                                                                                                                                       |     |     |      |          |          |
|----------------------------|----|------|----------|---------------------------------------------------------------------------------------------------------------------------------------|-----|-----|------|----------|----------|
|                            |    |      |          | YLL039C, YNL194C,<br>YIL099W                                                                                                          |     |     |      |          |          |
| Alkaloid metabolic process | 6  | 4.7  | 0.003944 | YBR117C, YMR303C,<br>YGR043C, YGR248W,<br>YDL085W, YGR256W                                                                            | 105 | 50  | 4882 | 5.579429 | 4.688111 |
| Amide transport            | 3  | 2.3  | 0.00431  | YIR028W, YJR152W,<br>YHL016C                                                                                                          | 105 | 5   | 4882 | 27.89714 | 5.113347 |
| Cell differentiation       | 13 | 10.2 | 0.005487 | YOR178C, YER096W,<br>YKL096W, YLR258W,<br>YNL202W, YPR192W,<br>YER054C, YML128C,<br>YDL222C, YDR001C,<br>YLL039C, YNL194C,<br>YIL099W | 105 | 245 | 4882 | 2.467094 | 6.467174 |

**MDS3e\_MKT1e: Up-regulated (214 genes)**

| Gene Ontology Term         | Count | %    | PValue   | Genes                                                                                                                                                                                                                                                                                                                                                                                                                                                                                                                                                                                                                                                                                                                                                                                                                            | List Total | Pop Hits | Pop Total | Fold Enrich. | FDR      |
|----------------------------|-------|------|----------|----------------------------------------------------------------------------------------------------------------------------------------------------------------------------------------------------------------------------------------------------------------------------------------------------------------------------------------------------------------------------------------------------------------------------------------------------------------------------------------------------------------------------------------------------------------------------------------------------------------------------------------------------------------------------------------------------------------------------------------------------------------------------------------------------------------------------------|------------|----------|-----------|--------------|----------|
| Mitochondrion organization | 84    | 39.4 | 3.73E-58 | YNL252C, YLR008C,<br>YHR147C, YDR337W,<br>YNL177C, YGR084C,<br>YHR038W, YKR006C,<br>YDR347W, YLR168C,<br>YKL138C, YJL063C,<br>YNL005C, YMR193W,<br>YJR101W, YOR266W,<br>YPL104W, YKL053C-A,<br>YPL173W, YCR003W,<br>YDR322W, YOR158W,<br>YPL215W, YNL315C,<br>YDR116C, YBL059C-A,<br>YBR185C, YLR382C,<br>YDL202W, YKL170W,<br>YMR024W, YGR215W,<br>YLL009C, YGR076C,<br>YGR165W, YCR071C,<br>YBR282W, YHR116W,<br>YHR024C, YNR022C,<br>YPR166C, YPR125W,<br>YBR268W, YDR041W,<br>YLR069C, YDR175C,<br>YNL284C, YDR405W,<br>YER050C, YGL129C,<br>YJL180C, YML025C,<br>YBR122C, YOR150W,<br>YEL030W, YDR393W,<br>YDR375C, YHL004W,<br>YPR047W, YKR085C,<br>YJR113C, YDR296W,<br>YNL137C, YEL020W-A,<br>YDR462W, YBR192W,<br>YHR011W, YIL093C,<br>YBL090W, YIL098C,<br>YER058W, YOL033W,<br>YBR146W, YPL040C,<br>YMR158W, YJL096W, | 185        | 275      | 4882      | 8.060698     | 4.71E-55 |

|                                    |     |      |          |                                                                                                                                                                                                                                                                                                                                                                                                                                                                                                                                                                                                                                                                                                                                                                                                                                                                                                                                                                                              |     |      |      |          |          |
|------------------------------------|-----|------|----------|----------------------------------------------------------------------------------------------------------------------------------------------------------------------------------------------------------------------------------------------------------------------------------------------------------------------------------------------------------------------------------------------------------------------------------------------------------------------------------------------------------------------------------------------------------------------------------------------------------------------------------------------------------------------------------------------------------------------------------------------------------------------------------------------------------------------------------------------------------------------------------------------------------------------------------------------------------------------------------------------|-----|------|------|----------|----------|
|                                    |     |      |          | YGL143C, YNL185C,<br>YDR237W, YPL189C-A,<br>YLR312W-A, YHR091C,<br>YOL023W, YMR188C                                                                                                                                                                                                                                                                                                                                                                                                                                                                                                                                                                                                                                                                                                                                                                                                                                                                                                          |     |      |      |          |          |
| Macromolecule biosynthetic process | 91  | 42.7 | 4.28E-08 | YNL252C, YHR147C,<br>YDR337W, YNL177C,<br>YGR084C, YHR038W,<br>YKR006C, YDR347W,<br>YKL138C, YJL063C,<br>YNL005C, YMR193W,<br>YJR101W, YPL104W,<br>YPL173W, YCR003W,<br>YDR322W, YOR158W,<br>YBR297W, YGR032W,<br>YDR116C, YBR120C,<br>YLR382C, YLR439W,<br>YDL202W, YKL170W,<br>YJR147W, YMR024W,<br>YNL122C, YGR215W,<br>YGL209W, YGR109W-B,<br>YLL009C, YGL068W,<br>YGR076C, YGL107C,<br>YGR165W, YCR071C,<br>YBR282W, YHR116W,<br>YGL236C, YNR022C,<br>YDR494W, YPR166C,<br>YPL156C, YCL027W,<br>YBR268W, YLR069C,<br>YDR041W, YDR175C,<br>YNL284C, YDR405W,<br>YER050C, YGL129C,<br>YMR319C, YML025C,<br>YBR122C, YOR150W,<br>YHR015W, YLR121C,<br>YHL004W, YPR047W,<br>YKR085C, YJR113C,<br>YDR296W, YNL137C,<br>YDR462W, YHR011W,<br>YIL093C, YPL097W,<br>YNR044W, YBL090W,<br>YEL050C, YER058W,<br>YGR220C, YBR296C,<br>YBR146W, YOL033W,<br>YAL039C, YPL040C,<br>YMR158W, YJL096W,<br>YGL143C, YNL185C,<br>YDR237W, YLR312W-A,<br>YGL125W, YHR091C,<br>YOL023W, YMR316W,<br>YMR188C | 185 | 1473 | 4882 | 1.630289 | 5.40E-05 |
| Protein metabolic process          | 100 | 46.9 | 5.79E-08 | YHR147C, YDR337W,<br>YNL177C, YGR084C,<br>YHR038W, YDR469W,<br>YNL005C, YMR193W,<br>YJR101W, YPL104W,<br>YPR151C, YPL173W,<br>YOR158W, YCR003W,<br>YDR322W, YLR439W,<br>YLR382C, YDL202W,<br>YNL122C, YJR147W,<br>YGR215W, YGL209W,                                                                                                                                                                                                                                                                                                                                                                                                                                                                                                                                                                                                                                                                                                                                                          | 185 | 1699 | 4882 | 1.553219 | 7.30E-05 |

|                 |    |      |          |                                                                                                                                                                                                                                                                                                                                                                                                                                                                                                                                                                                                                                                                                                                                                                                                                                                                                                                                       |     |      |      |          |          |
|-----------------|----|------|----------|---------------------------------------------------------------------------------------------------------------------------------------------------------------------------------------------------------------------------------------------------------------------------------------------------------------------------------------------------------------------------------------------------------------------------------------------------------------------------------------------------------------------------------------------------------------------------------------------------------------------------------------------------------------------------------------------------------------------------------------------------------------------------------------------------------------------------------------------------------------------------------------------------------------------------------------|-----|------|------|----------|----------|
|                 |    |      |          | <p>YGR165W, YJL046W,<br/> YCR071C, YGL236C,<br/> YPR166C, YBR268W,<br/> YDR041W, YPL072W,<br/> YDR175C, YER050C,<br/> YGL129C, YML025C,<br/> YBR122C, YOR150W,<br/> YLR121C, YJL117W,<br/> YKR085C, YDR462W,<br/> YHR011W, YNR044W,<br/> YER058W, YIL098C,<br/> YBR296C, YPL040C,<br/> YMR158W, YNL185C,<br/> YDR237W, YLR312W-A,<br/> YHR091C, YMR316W,<br/> YMR188C, YNL252C,<br/> YKR006C, YDR347W,<br/> YKL138C, YJL063C,<br/> YBR120C, YDR116C,<br/> YLR239C, YKL170W,<br/> YMR024W, YGR109W-B,<br/> YLL009C, YGL068W,<br/> YGR076C, YGL107C,<br/> YBR282W, YHR109W,<br/> YHR116W, YHR024C,<br/> YNR022C, YDR494W,<br/> YPL156C, YCL027W,<br/> YLR069C, YNL284C,<br/> YDR405W, YMR319C,<br/> YEL030W, YHR015W,<br/> YKL087C, YHL004W,<br/> YPR047W, YJR113C,<br/> YNL137C, YIL093C,<br/> YPL097W, YBL090W,<br/> YEL050C, YGR220C,<br/> YBR146W, YOL033W,<br/> YDR184C, YAL039C,<br/> YJL096W, YGL143C,<br/> YGL125W, YOL023W</p> |     |      |      |          |          |
| Gene expression | 94 | 44.1 | 5.33E-07 | <p>YLR204W, YNL252C,<br/> YHR147C, YDR337W,<br/> YNL177C, YGR084C,<br/> YHR038W, YKR006C,<br/> YDR347W, YKL138C,<br/> YJL063C, YNL005C,<br/> YMR193W, YJR101W,<br/> YPL104W, YPL173W,<br/> YCR003W, YDR322W,<br/> YOR158W, YBR297W,<br/> YDR116C, YBR120C,<br/> YML080W, YLR382C,<br/> YLR439W, YDL202W,<br/> YKL170W, YJR147W,<br/> YNL122C, YMR024W,<br/> YGR215W, YGL209W,<br/> YGL068W, YGL107C,<br/> YGR076C, YGR165W,<br/> YCR071C, YBR282W,<br/> YHR116W, YGL236C,<br/> YHR024C, YOL080C,<br/> YNR022C, YDR494W,</p>                                                                                                                                                                                                                                                                                                                                                                                                           | 185 | 1620 | 4882 | 1.531225 | 6.72E-04 |

|                               |     |      |          |                                                                                                                                                                                                                                                                                                                                                                                                                                                                                                                                                                                                                                                                                                                                                                                      |     |      |      |         |          |
|-------------------------------|-----|------|----------|--------------------------------------------------------------------------------------------------------------------------------------------------------------------------------------------------------------------------------------------------------------------------------------------------------------------------------------------------------------------------------------------------------------------------------------------------------------------------------------------------------------------------------------------------------------------------------------------------------------------------------------------------------------------------------------------------------------------------------------------------------------------------------------|-----|------|------|---------|----------|
|                               |     |      |          | YDR194C, YPR166C,<br>YPL156C, YCL027W,<br>YBR268W, YLR069C,<br>YDR041W, YDR175C,<br>YNL284C, YDR405W,<br>YER050C, YGL129C,<br>YMR319C, YML025C,<br>YBR122C, YOR150W,<br>YHR015W, YLR121C,<br>YHL004W, YPR047W,<br>YKR085C, YJR113C,<br>YDR296W, YNL137C,<br>YDR462W, YHR011W,<br>YIL093C, YPL097W,<br>YNR044W, YBL090W,<br>YGR150C, YER058W,<br>YEL050C, YGR220C,<br>YBR296C, YBR146W,<br>YOL033W, YAL039C,<br>YPL040C, YMR158W,<br>YJL096W, YGL143C,<br>YNL185C, YDR237W,<br>YLR312W-A, YGL125W,<br>YHR091C, YOL023W,<br>YMR316W, YMR188C                                                                                                                                                                                                                                           |     |      |      |         |          |
| Cellular biosynthetic process | 102 | 47.9 | 8.23E-06 | YHR147C, YDR337W,<br>YNL177C, YGR084C,<br>YHR038W, YNL005C,<br>YMR193W, YJR101W,<br>YPL104W, YPL173W,<br>YOR158W, YCR003W,<br>YDR322W, YGR032W,<br>YBR297W, YLR439W,<br>YLR382C, YDL202W,<br>YPL172C, YNL122C,<br>YJR147W, YGR215W,<br>YGL209W, YGR165W,<br>YDR511W, YCR071C,<br>YGL236C, YPR166C,<br>YPL252C, YBR268W,<br>YDR041W, YDR175C,<br>YBR213W, YER050C,<br>YGL129C, YML025C,<br>YBR122C, YOR150W,<br>YNL111C, YLR121C,<br>YKR085C, YDR462W,<br>YHR011W, YNR044W,<br>YER058W, YBR296C,<br>YPL040C, YMR158W,<br>YNL185C, YDR237W,<br>YLR312W-A, YHR091C,<br>YMR316W, YMR188C,<br>YNL252C, YKR006C,<br>YDR347W, YKL138C,<br>YMR095C, YJL063C,<br>YKR071C, YDR441C,<br>YBR120C, YDR116C,<br>YLR239C, YKL170W,<br>YMR024W, YGR109W-B,<br>YLL009C, YGL068W,<br>YGL107C, YGR076C, | 185 | 1914 | 4882 | 1.40632 | 0.010377 |

|                                                |    |     |          |                                                                                                                                                                                                                                                                                                                        |     |     |      |          |          |
|------------------------------------------------|----|-----|----------|------------------------------------------------------------------------------------------------------------------------------------------------------------------------------------------------------------------------------------------------------------------------------------------------------------------------|-----|-----|------|----------|----------|
|                                                |    |     |          | YBR282W, YHR116W,<br>YNR022C, YDR494W,<br>YPL156C, YJR122W,<br>YCL027W, YLR069C,<br>YNL284C, YDR405W,<br>YMR319C, YHR015W,<br>YHL004W, YMR062C,<br>YPR047W, YJR113C,<br>YDR296W, YNL137C,<br>YIL093C, YPL097W,<br>YBL090W, YEL050C,<br>YGR220C, YBR146W,<br>YOL033W, YAL039C,<br>YJL096W, YGL143C,<br>YGL125W, YOL023W |     |     |      |          |          |
| Generation of precursor metabolites and energy | 21 | 9.9 | 0.001999 | YML120C, YNL177C,<br>YBR238C, YIL070C,<br>YPL252C, YHR011W,<br>YFR033C, YDR116C,<br>YDR175C, YBR185C,<br>YMR256C, YMR145C,<br>YMR267W, YJR048W,<br>YGL068W, YGL107C,<br>YDR375C, YGR165W,<br>YNL111C, YHR116W,<br>YMR188C                                                                                              | 185 | 264 | 4882 | 2.09914  | 2.493083 |
| Mitochondrial membrane organization            | 6  | 2.8 | 0.008237 | YEL020W-A, YPR125W,<br>YOR266W, YDR393W,<br>YLR168C, YBR185C                                                                                                                                                                                                                                                           | 185 | 34  | 4882 | 4.656916 | 9.908052 |



**Table S2: List of genes whose expression is significantly affected by the epistatic interaction between *MKT1e* and *MDS3e* (FDR-corrected p-value < 0.01).**

| <b>Antagonistic Effect (114 genes)</b> |         |         |         |           |         |           |         |
|----------------------------------------|---------|---------|---------|-----------|---------|-----------|---------|
| Gene ID                                | p-value | Gene ID | p-value | Gene ID   | p-value | Gene ID   | p-value |
| YML128C                                | 5.4E-06 | YEL024W | 8.8E-05 | YEL050C   | 2.1E-04 | YOR205C   | 3.3E-04 |
| YJR101W                                | 5.7E-06 | YBL043W | 9.3E-05 | YPR066W   | 2.2E-04 | YMR090W   | 3.3E-04 |
| YNL252C                                | 6.2E-06 | YOL084W | 9.7E-05 | YER093C-A | 2.2E-04 | YOL038W   | 3.3E-04 |
| YDL222C                                | 1.1E-05 | YIL047C | 1.0E-04 | YDR453C   | 2.2E-04 | YBR024W   | 3.4E-04 |
| YDR116C                                | 2.1E-05 | YHR096C | 1.0E-04 | YDR034W-B | 2.3E-04 | YDR148C   | 3.4E-04 |
| YOR120W                                | 2.4E-05 | YJL048C | 1.2E-04 | YCL033C   | 2.3E-04 | YDR033W   | 3.5E-04 |
| YNL137C                                | 2.4E-05 | YKR067W | 1.2E-04 | YBR150C   | 2.3E-04 | YHR138C   | 3.5E-04 |
| YPL172C                                | 2.5E-05 | YDL198C | 1.2E-04 | YBR054W   | 2.3E-04 | YDR503C   | 3.5E-04 |
| YCR020C                                | 2.8E-05 | YHR035W | 1.2E-04 | YDR511W   | 2.4E-04 | YIL155C   | 3.5E-04 |
| YDL202W                                | 3.3E-05 | YGR165W | 1.2E-04 | YBL059W   | 2.4E-04 | YOR201C   | 3.6E-04 |
| YLR439W                                | 4.5E-05 | YML030W | 1.2E-04 | YKR085C   | 2.4E-04 | YLL041C   | 3.6E-04 |
| YML120C                                | 4.6E-05 | YBL030C | 1.2E-04 | YIL089W   | 2.4E-04 | YGL187C   | 3.6E-04 |
| YEL059C-A                              | 4.7E-05 | YGR065C | 1.3E-04 | YKL150W   | 2.5E-04 | YDR059C   | 3.8E-04 |
| YMR056C                                | 4.8E-05 | YKR049C | 1.4E-04 | YGR138C   | 2.5E-04 | YBR003W   | 3.8E-04 |
| YBR044C                                | 4.9E-05 | YFL030W | 1.5E-04 | YIL136W   | 2.5E-04 | YCR027C   | 3.9E-04 |
| YPL040C                                | 5.2E-05 | YGR201C | 1.5E-04 | YMR271C   | 2.6E-04 | YOL052C-A | 3.9E-04 |
| YGR088W                                | 5.3E-05 | YCR026C | 1.6E-04 | YER053C-A | 2.7E-04 | YGR138C   | 4.0E-04 |
| YJL159W                                | 5.5E-05 | YDL183C | 1.7E-04 | YDR391C   | 2.7E-04 | YGR021W   | 4.0E-04 |
| YNL306W                                | 5.7E-05 | YLR289W | 1.7E-04 | YJL180C   | 2.7E-04 | YNR020C   | 4.0E-04 |
| YBR117C                                | 5.8E-05 | YNL160W | 1.8E-04 | YOR032C   | 2.8E-04 | YKR039W   | 4.2E-04 |
| YCR023C                                | 6.1E-05 | YLR069C | 1.8E-04 | YIL037C   | 2.8E-04 | YDL227C   | 4.2E-04 |
| YDR375C                                | 6.9E-05 | YJL070C | 1.8E-04 | YPL186C   | 2.8E-04 | YOL048C   | 4.3E-04 |
| YDR430C                                | 7.0E-05 | YMR293C | 1.8E-04 | YKL026C   | 2.9E-04 | YHR022C   | 4.3E-04 |
| YDL085W                                | 7.1E-05 | YML012W | 1.8E-04 | YDR115W   | 2.9E-04 | YJR149W   | 4.3E-04 |
| YJR080C                                | 7.1E-05 | YML087C | 1.9E-04 | YDR070C   | 3.1E-04 |           |         |
| YPL097W                                | 7.3E-05 | YNR040W | 1.9E-04 | YKR016W   | 3.1E-04 |           |         |
| YNL052W                                | 7.5E-05 | YGR070W | 1.9E-04 | YKL051W   | 3.2E-04 |           |         |
| YBL038W                                | 7.7E-05 | YHL029C | 1.9E-04 | YJR108W   | 3.2E-04 |           |         |
| YKL194C                                | 8.1E-05 | YCR019W | 1.9E-04 | YMR008C   | 3.2E-04 |           |         |
| YOR150W                                | 8.2E-05 | YNL004W | 2.1E-04 | YDL181W   | 3.3E-04 |           |         |
| <b>Synergistic Effect (136 genes)</b>  |         |         |         |           |         |           |         |
| Gene ID                                | p-value | Gene ID | p-value | Gene ID   | p-value | Gene ID   | p-value |

|         |         |         |       |           |          |         |         |
|---------|---------|---------|-------|-----------|----------|---------|---------|
| YLL061W | 7.8E-06 | YPL086C | 6E-05 | YPR058W   | 0.000185 | YHR053C | 3.2E-04 |
| YJL012C | 1.0E-05 | YDR322W | 8E-05 | YNR037C   | 0.000188 | YDL082W | 3.2E-04 |
| YGL107C | 1.1E-05 | YGL232W | 8E-05 | YGR076C   | 0.000205 | YMR193W | 3.3E-04 |
| YDR237W | 1.1E-05 | YPR035W | 8E-05 | YPR045C   | 0.000211 | YNL258C | 3.3E-04 |
| YOR315W | 1.2E-05 | YBR294W | 8E-05 | YJL002C   | 0.000215 | YMR033W | 3.3E-04 |
| YGR084C | 1.2E-05 | YMR024W | 9E-05 | YGL068W   | 0.000221 | YIL098C | 3.3E-04 |
| YNL185C | 1.2E-05 | YPR047W | 1E-04 | YGR055W   | 0.000222 | YER073W | 3.4E-04 |
| YBR146W | 1.4E-05 | YOR266W | 1E-04 | YER156C   | 0.000223 | YML126C | 3.4E-04 |
| YGL129C | 1.5E-05 | YNR015W | 1E-04 | YDR390C   | 0.000227 | YPL246C | 3.4E-04 |
| YGR234W | 1.6E-05 | YBL107C | 1E-04 | YGL253W   | 0.000233 | YKL126W | 3.5E-04 |
| YPR002W | 1.7E-05 | YKL003C | 1E-04 | YOR323C   | 0.0002   | YLR348C | 3.5E-04 |
| YBR093C | 1.8E-05 | YIL164C | 1E-04 | YHR132W-A | 0.0002   | YKL084W | 3.6E-04 |
| YMR062C | 1.9E-05 | YDR427W | 1E-04 | YBL061C   | 0.0003   | YKL069W | 3.6E-04 |
| YGR150C | 2.4E-05 | YOR158W | 1E-04 | YGR020C   | 0.0003   | YER081W | 3.7E-04 |
| YLR053C | 2.4E-05 | YGR233C | 1E-04 | YNL122C   | 0.0003   | YDL007W | 3.7E-04 |
| YHR029C | 3.0E-05 | YNL217W | 1E-04 | YHR136C   | 0.0003   | YJR113C | 3.8E-04 |
| YPR194C | 3.0E-05 | YIL093C | 1E-04 | YAR073W   | 0.0003   | YJR075W | 3.8E-04 |
| YPL244C | 3.1E-05 | YDL237W | 1E-04 | YJL208C   | 0.0003   | YJR064W | 3.9E-04 |
| YLR017W | 3.2E-05 | YKL195W | 1E-04 | YKL218C   | 0.0003   | YGR148C | 3.9E-04 |
| YDR281C | 3.5E-05 | YGR275W | 1E-04 | YKR006C   | 0.0003   | YPR118W | 4.0E-04 |
| YDR494W | 3.7E-05 | YBL022C | 1E-04 | YOR046C   | 0.0003   | YFR030W | 4.0E-04 |
| YPL019C | 3.9E-05 | YMR064W | 1E-04 | YGL236C   | 0.0003   | YIL009W | 4.0E-04 |
| YNR067C | 3.9E-05 | YLR155C | 1E-04 | YNR028W   | 0.0003   | YPL208W | 4.0E-04 |
| YLR447C | 4.1E-05 | YJL191W | 1E-04 | YBR245C   | 0.0003   | YLR239C | 4.1E-04 |
| YAR071W | 4.8E-05 | YIR029W | 1E-04 | YHR137W   | 0.0003   | YER058W | 4.2E-04 |
| YKL087C | 4.9E-05 | YMR005W | 1E-04 | YFL031W   | 0.0003   | YPL147W | 4.2E-04 |
| YBR296C | 5.1E-05 | YKL138C | 2E-04 | YDR345C   | 0.0003   | YHR092C | 4.3E-04 |
| YBR263W | 5.2E-05 | YDR175C | 2E-04 | YLL018C   | 0.0003   | YML091C | 4.3E-04 |
| YDR493W | 5.3E-05 | YNR022C | 2E-04 | YER072W   | 0.0003   |         |         |
| YHR011W | 5.5E-05 | YJL117W | 2E-04 | YDL045W-A | 0.0003   |         |         |
| YCR071C | 5.5E-05 | YPL265W | 2E-04 | YMR011W   | 0.0003   |         |         |
| YJR048W | 5.7E-05 | YOR217W | 2E-04 | YNL213C   | 0.0003   |         |         |
| YOR184W | 5.9E-05 | YIR012W | 2E-04 | YIR031C   | 0.0003   |         |         |
| YJL217W | 5.9E-05 | YHR207C | 2E-04 | YHR128W   | 0.0003   |         |         |
| YML123C | 6.0E-05 | YMR039C | 2E-04 | YMR088C   | 0.0003   |         |         |
| YJL172W | 6.4E-05 | YMR318C | 2E-04 | YDR347W   | 0.0003   |         |         |
